# Supplementary material
Source: MDPI journal article supplement (https://www.mdpi.com/2079-6412/13/12/2056)
Supplement: s1 [file s1 › coatings-2710880-supplementary.pdf]

# Supplementary Information: Facilitating Synthesis of FeP/C@CoP Composites as High-Performance Anode Materials for Sodium-Ion Batteries

Tianle Mao, Zheyu Hong, Haoran Ding, Jintang Li \*, Yongji Xia, Zhidong Zhou and Guanghui Yue \*

College of Materials, Xiamen University, Xiamen 361005, China

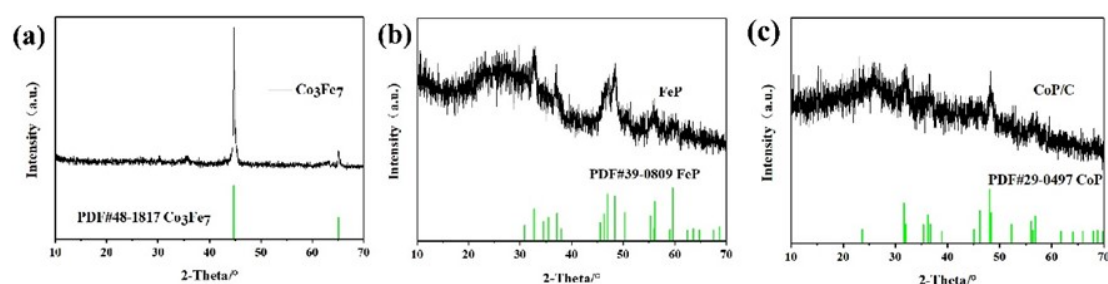

Figure S1. XRD diffraction pattern of (a) Fe-MOF@Co-based nanoarray composite carbide product  $\text{Co}_3\text{Fe}_7/\text{C}$ ; (b) Fe-MOF Phosphating product  $\text{FeP}/\text{C}$ ; (c) ZIF-67 phosphating product  $\text{CoP}/\text{C}$ .

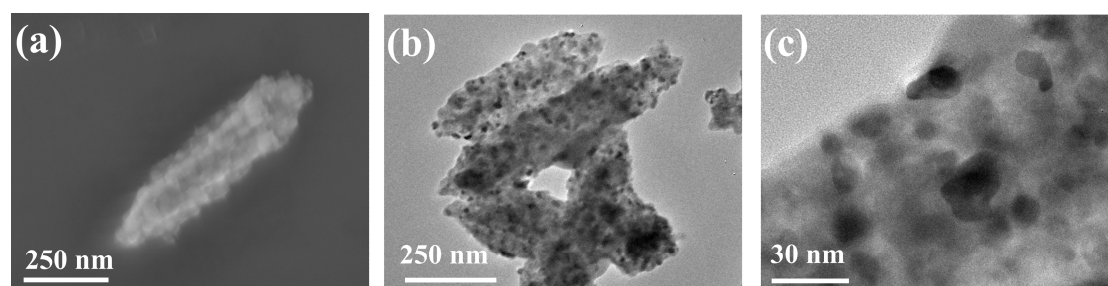

Figure S2 (a) SEM image and (b,c) TEM images of  $\text{FeP}/\text{C}$ .

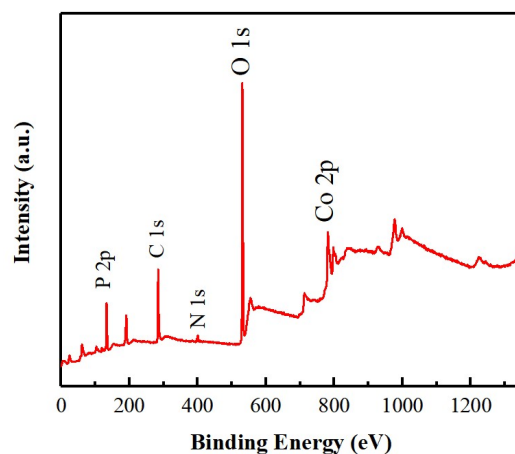

**Figure S3 XPS survey spectrum of FeP/C@CoP.**

| Element | Weight% | Atomic% |
|---------|---------|---------|
| C K     | 8.20    | 15.21   |
| O K     | 41.00   | 57.10   |
| P K     | 23.69   | 17.04   |
| Fe K    | 18.90   | 7.54    |
| Co K    | 8.21    | 3.11    |
| Totals  | 100.00  |         |

**Table S1. The mass fraction of an element of FeP/C@CoP.**

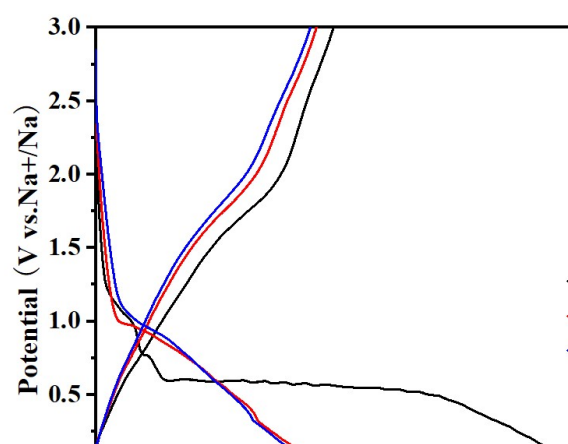

**Figure S4 the first three capacity-voltage profiles at 0.1 A g<sup>-1</sup> of FeP/C.**

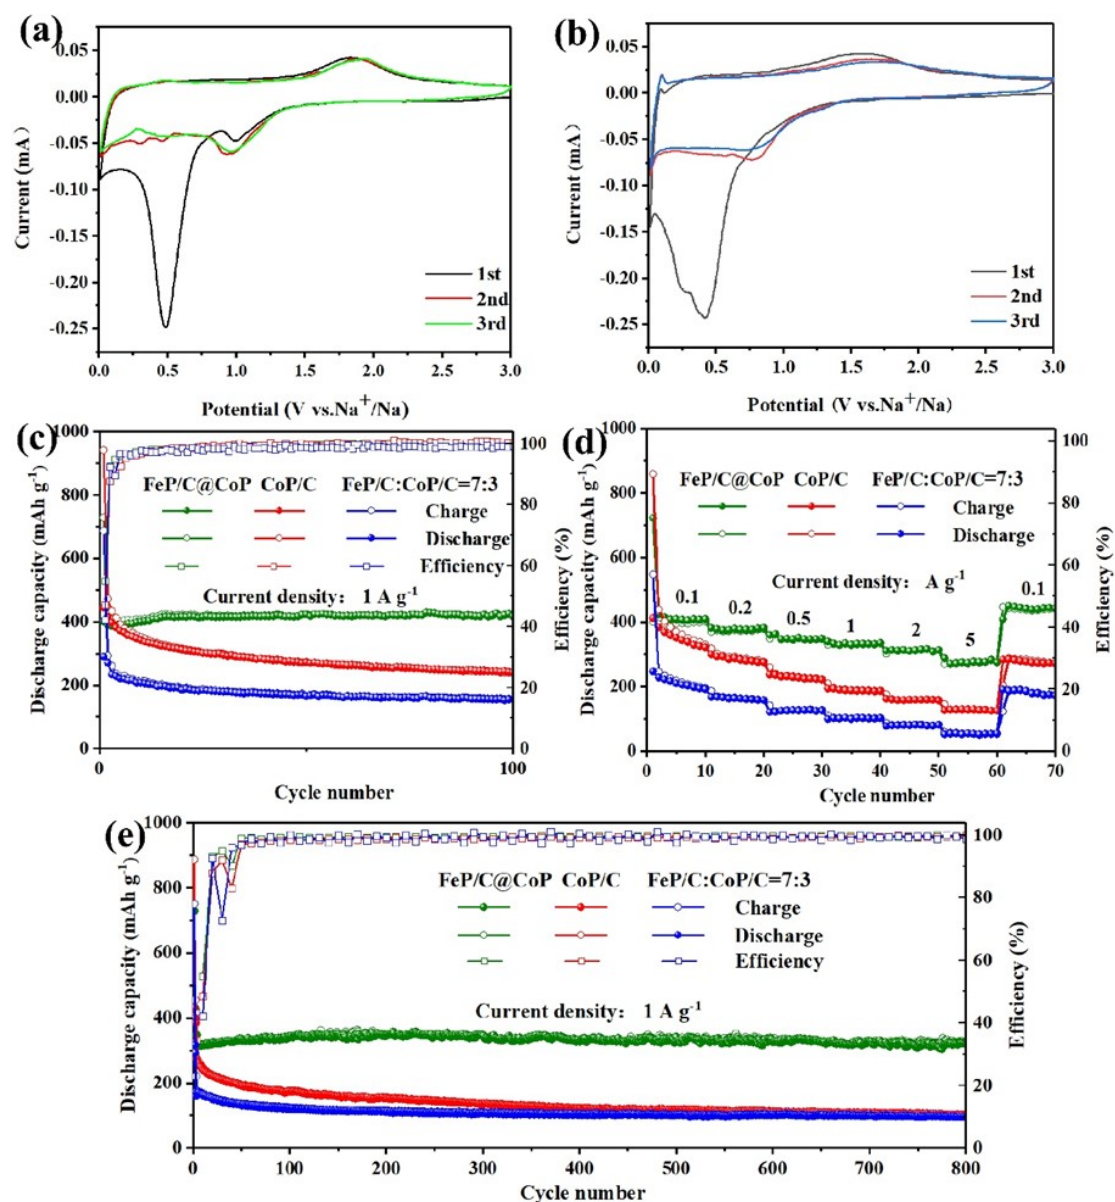

Figure S5 The first three CV curves at 0.1 mV s<sup>-1</sup> in the voltage of 0.01-3.0 V of (a) FeP/C and (b) FeP/C: CoP/C=7: 3 composites. (c) Cycling performance of FeP/C@CoP, CoP/C and FeP/C: CoP/C=7: 3 electrodes at current of 0.1 A g<sup>-1</sup>; (d) the rate performance from 0.1 A g<sup>-1</sup> to 5 A g<sup>-1</sup>; (e) the long cycling performance at 1 A g<sup>-1</sup>.

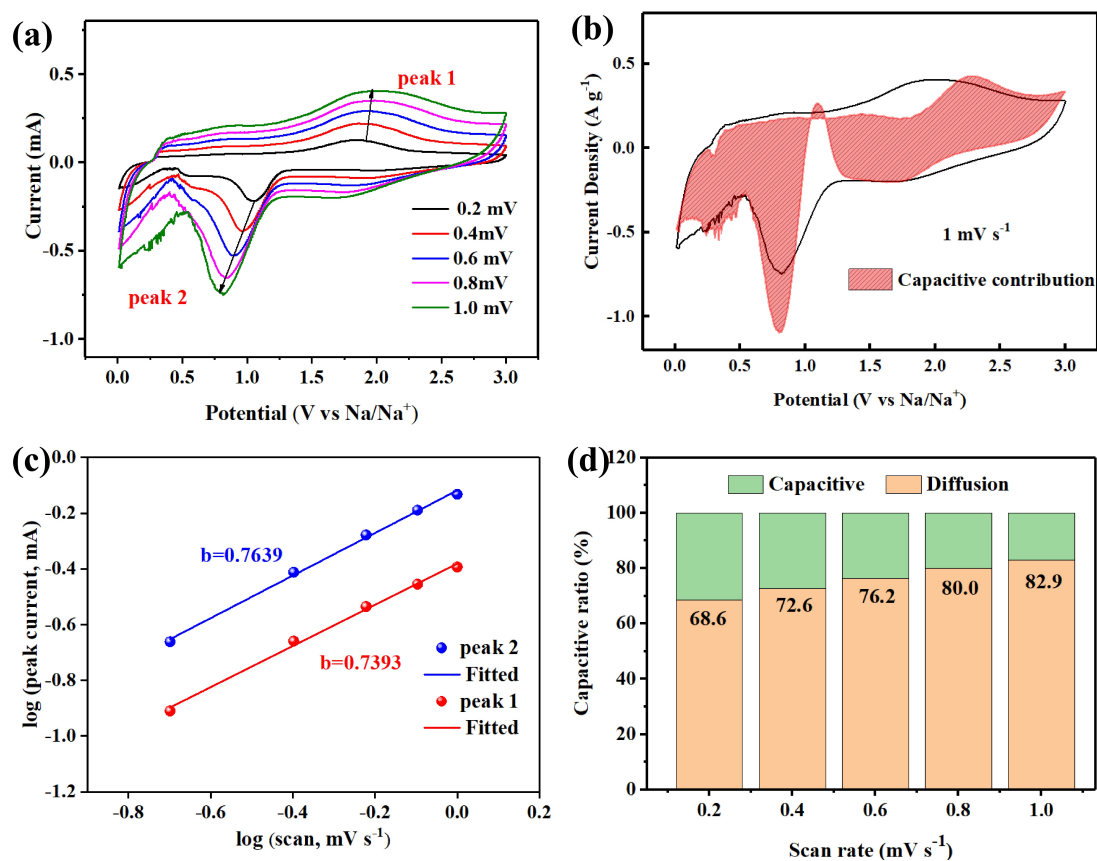

Figure S6 (a) The CV curve of the FeP/C electrode at different scan rates from 0.1 to 1 mV s<sup>-1</sup>. (b) the pseudo-capacitance contribution at 1 mV s<sup>-1</sup>. (c) the b-value graph of the two curves. (d) the contribution rate of capacitance at different scan rates.
